# Supplementary material for: Active learning-based framework for optimal reaction mechanism selection from microkinetic modeling: a case study of electrocatalytic oxygen reduction reaction on carbon nanotubes
Source: Royal Society of Chemistry journal article supplement (doi:10.1039/c9cp06190h), 2020-01-01
Supplement: c9cp06190h1.pdf [file c9cp06190h1.pdf]

## Supplementary Information.

Active learning-based framework for optimal reaction mechanism selection from microkinetic modeling: A case study of electrocatalytic oxygen reduction reaction on carbon nanotubes

Aleksandr A. Kurilovich<sup>a</sup>, Caleb T. Alexander<sup>b</sup>, Egor M. Pazhetnov<sup>a</sup>, and Keith J. Stevenson<sup>\*a</sup>

---

*a Skolkovo Institute of Science and Technology, Skolkovo Innovation Center, Building 3, Moscow, 143026, Russian Federation.*

*b 12318 Mossycup Dr. Houston, Texas 77024, USA.*

### Mean-field microkinetic modeling details.

Flat electrode surface with uniformly distributed carbon active sites, which are equally accessible for  $O_2$  and  $HO_2^-$  species was considered in simulations. The concentration profile on the vicinity of the electrode surface was assumed to be linear for  $O_2$  and  $HO_2^-$  species. The diffusion in the bulk of the electrode was neglected because of the low catalyst loadings.

Then the effective diffusion layer thickness  $\delta_{O_2,HO_2^-}$  {cm} for  $O_2$  and  $HO_2^-$  is evaluated from the approximate analytical solution for RDE reported by Levich<sup>1</sup>.

$$\delta_{O_2,HO_2^-} = 1.61 D_{O_2,HO_2^-}^{1/3} \nu^{1/6} \omega^{-1/2}$$

Here,  $D_{O_2,HO_2^-}$  {cm<sup>2</sup> s<sup>-1</sup>} are diffusivities of  $O_2$  and  $HO_2^-$  respectively,  $\nu$  {cm<sup>2</sup> s<sup>-1</sup>} – kinematic viscosity,  $\omega$  {rad s<sup>-1</sup>} – RDE rotation rate. The values for  $D_{O_2,HO_2^-}$  and  $\nu$  were taken from literature data<sup>2</sup>.

All rate constant values are reported for the 0.1 M KOH solution. The rate constants for effective 2e<sup>-</sup> charge transfer steps are given at  $E_0 = 0.7404$  V vs. RHE. Prior to each numerical solution, the backward rate constant value for the charge transfer step was numerically calculated to reproduce the standard potential of  $O_2/HO_2^-$  redox pair in alkaline media.

### Model (a)

Three steps are considered within this model.

1) Oxygen adsorption/desorption step on/from the surface:

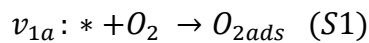

2) Effective 2e<sup>-</sup> reduction/oxidation step of/to  $O_2$  to/from  $HO_2^-$ . Reaction product remains adsorbed on the surface:

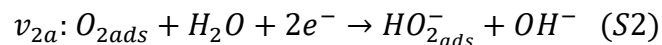

3)  $\text{HO}_2^-$  desorption/adsorption step from/on the surface:

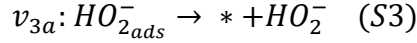

The rates of steps can be formally expressed as follows:

$$v_{1a} = k_{1a}c_{\text{O}_2}(1 - \theta_{\text{O}_2} - \theta_{\text{HO}_2^-}) - k_{-1a}\theta_{\text{O}_2} \quad (\text{S4})$$

$$v_{2a} = k_{2a}\theta_{\text{O}_2}\exp\left(-\frac{\alpha_{2a}F(E - E_o)}{RT}\right) - k_{-2a}\theta_{\text{HO}_2^-}\exp\left(\frac{(1 - \alpha_{2a})F(E - E_o)}{RT}\right) \quad (\text{S5})$$

$$v_{3a} = k_{3a}\theta_{\text{HO}_2^-} - k_{-3a}c_{\text{HO}_2^-}(1 - \theta_{\text{O}_2} - \theta_{\text{HO}_2^-}) \quad (\text{S6})$$

Here  $k_{1a}/k_{-1a}$   $\{\text{cm}^3 \text{mol}^{-1} \text{s}^{-1} / \text{s}^{-1}\}$  are forward/backward rate constants for reaction step (S1),  $k_{2a}/k_{-2a}$   $\{\text{s}^{-1} / \text{s}^{-1}\}$  are forward/backward rate constants for reaction step (S2),  $\alpha_{2a}$  {1}- charge transfer coefficient in (S2),  $k_{3a}/k_{-3a}$   $\{\text{s}^{-1} / \text{cm}^3 \text{mol}^{-1} \text{s}^{-1}\}$  are forward/backward rate constants for reaction step (S3),  $\theta_{\text{O}_2}/\theta_{\text{HO}_2^-}$  {1/1} are surface coverages by  $\text{O}_2$  and  $\text{HO}_2^-$  species respectively,  $E_o$  – potential at which rate constants for electrochemical step were specified (0.7404 V vs. RHE in this work),  $R$  – universal gas constant  $\{\text{J K}^{-1} \text{mol}^{-1}\}$ ,  $F$  – Faraday constant  $\{\text{C mol}^{-1}\}$ , and  $T$  – temperature  $\{\text{K}\}$  (298 K in this work).

The model, which was solved numerically:

$$\left\{ \begin{array}{l} \frac{d\theta_{\text{O}_2}}{dt} = 0 = v_{1a} - v_{2a} \\ \frac{d\theta_{\text{HO}_2^-}}{dt} = 0 = v_{2a} - v_{3a} \\ D_{\text{O}_2} \left( \frac{dc_{\text{O}_2}}{dx} \right)_{x=0} \approx D_{\text{O}_2} \frac{c_{\text{O}_2}^* - c_{\text{O}_2}}{\delta_{\text{O}_2}} = \Gamma_C v_{1a} \\ D_{\text{HO}_2^-} \left( \frac{dc_{\text{HO}_2^-}}{dx} \right)_{x=0} \approx D_{\text{HO}_2^-} \frac{c_{\text{HO}_2^-}^* - c_{\text{HO}_2^-}}{\delta_{\text{HO}_2^-}} = -\Gamma_C v_{3a} \end{array} \right. \quad (\text{S7})$$

Here  $c_{\text{O}_2}/c_{\text{HO}_2^-}$   $\{\text{mol cm}^{-3}\}$  are concentrations of  $\text{O}_2$  and  $\text{HO}_2^-$  species in the vicinity of the electrode surface,  $c_{\text{O}_2}^*/c_{\text{HO}_2^-}^*$   $\{\text{mol cm}^{-3}\}$  are concentrations of  $\text{O}_2$  and  $\text{HO}_2^-$  in the bulk of electrolyte, given by oxygen solubility in 0.1 M KOH<sup>3</sup> and experimental conditions for HPRR/HPOR.  $\Gamma_C$  is CNT

active site surface density {mol cm<sup>-2</sup>}. It was recalculated from the value used in our previous simulations<sup>4</sup> for Vulcan Carbon XC-72 (VC) using the ratios of BET surface areas and mass loadings for VC and CNTs.

If one wants to simulate ORR proceeding within the same reaction mechanism but in non-steady state approximation, then the system of ordinary differential equations should be solved numerically. Linear dependence of RDE potential on time should be introduced. Non-zero time derivatives of surface coverages will be expressed the same way as in (S7). Time-derivatives of surface coverages can be calculated as was shown in<sup>5</sup>

Finally, the geometric current density  $I_{geom}(E)$  is evaluated from:

$$I_{geom}(E) = -2F\Gamma_C v_{2a}(E) \quad (S8)$$

### Model (b)

This model is obtained by simplification of the Model (a) by merging steps (S2) and (S3). No adsorbed HO<sub>2</sub><sup>-</sup> considered (fast HO<sub>2</sub><sup>-</sup> adsorption/desorption step).

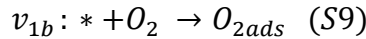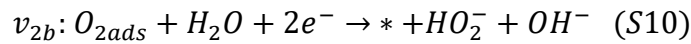

Then, the rates will be:

$$v_{1b} = k_{1b}c_{O_2}(1 - \theta_{O_2}) - k_{-1b}\theta_{O_2} \quad (S11)$$

$$v_{2b} = k_{2b}\theta_{O_2}\exp\left(-\frac{\alpha_{2b}F(E - E_o)}{RT}\right) - k_{-2b}c_{HO_2^-}(1 - \theta_{O_2})\exp\left(\frac{(1 - \alpha_{2b})F(E - E_o)}{RT}\right) \quad (S12)$$



Here  $k_{1b}/k_{-1b}$   $\{\text{cm}^3 \text{ mol}^{-1} \text{ s}^{-1} / \text{s}^{-1}\}$  are forward/backward rate constants for reaction step (S9),  $k_{2b}/k_{-2b}$   $\{\text{s}^{-1} / \text{cm}^3 \text{ mol}^{-1} \text{ s}^{-1}\}$  are forward/backward rate constants for reaction step (S10), and  $\alpha_{2b}$  {1}- charge transfer coefficient in (S10).

Numerical model:

$$\left\{ \begin{array}{l} \frac{d\theta_{O_2}}{dt} = 0 = v_{1b} - v_{2b} \\ D_{O_2} \left( \frac{dc_{O_2}}{dx} \right)_{x=0} \approx D_{O_2} \frac{c_{O_2}^* - c_{O_2}}{\delta_{O_2}} = \Gamma_C v_{1b} \\ D_{HO_2^-} \left( \frac{dc_{HO_2^-}}{dx} \right)_{x=0} \approx D_{HO_2^-} \frac{c_{HO_2^-}^* - c_{HO_2^-}}{\delta_{HO_2^-}} = -\Gamma_C v_{2b} \end{array} \right. \quad (S13)$$

Geometric current density:

$$I_{geom}(E) = -2F\Gamma_C v_{2b}(E) \quad (S14)$$

### Model (c)

No surface coverages are considered within the simplest single step model:

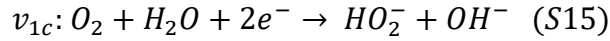

Reaction rate:

$$v_{1c} = k_{1c} c_{O_2} \exp\left(-\frac{\alpha_{1c} F(E - E_o)}{RT}\right) - k_{-1c} c_{HO_2^-} \exp\left(\frac{(1 - \alpha_{1c}) F(E - E_o)}{RT}\right) \quad (S16)$$

Here  $k_{1c}/k_{-1c}$   $\{\text{cm}^3 \text{ mol}^{-1} \text{ s}^{-1} / \text{cm}^3 \text{ mol}^{-1} \text{ s}^{-1}\}$  are forward/backward rate constants for reaction step (S15), and  $\alpha_{1c}$  {1}- charge transfer coefficient in (S15).

Numerical model:

$$\left\{ \begin{array}{l} D_{O_2} \left( \frac{dc_{O_2}}{dx} \right)_{x=0} \approx D_{O_2} \frac{c_{O_2}^* - c_{O_2}}{\delta_{O_2}} = \Gamma_C v_{1c} \\ D_{HO_2^-} \left( \frac{dc_{HO_2^-}}{dx} \right)_{x=0} \approx D_{HO_2^-} \frac{c_{HO_2^-}^* - c_{HO_2^-}}{\delta_{HO_2^-}} = -\Gamma_C v_{1c} \end{array} \right. \quad (S17)$$

Geometric current density:

$$I_{geom}(E) = -2F\Gamma_C v_{1c}(E) \quad (S18)$$

**Supplementary Table 1.** Estimated uncertainties of independent model parameters.

| Model parameter                | Overall parameter sampling interval           | ORR fitting. Minimal interval, which contains all parameters giving the accuracy of fitting lower than experimental error. | ORR and HPRR/HPOR fitting. Minimal interval, which contains all parameters giving the accuracy of fitting lower than experimental error. |
|--------------------------------|-----------------------------------------------|----------------------------------------------------------------------------------------------------------------------------|------------------------------------------------------------------------------------------------------------------------------------------|
| Model (a)                      |                                               |                                                                                                                            |                                                                                                                                          |
| $k_{1a}, s^{-1} cm^3 mol^{-1}$ | $3.4 \times 10^{-4} \dots 3.4 \times 10^{10}$ | $2.8 \times 10^6 \dots 1.3 \times 10^7$                                                                                    | $2.8 \times 10^6 \dots 7.2 \times 10^7$                                                                                                  |
| $k_{-1a}, s^{-1}$              | $3.4 \times 10^{-4} \dots 3.4 \times 10^{10}$ | $3.4 \times 10^0 \dots 1.9 \times 10^8$                                                                                    | $2.2 \times 10^0 \dots 5.6 \times 10^7$                                                                                                  |
| $k_{2a}, s^{-1}$               | $3.4 \times 10^{-4} \dots 3.4 \times 10^{10}$ | $4.8 \times 10^{-2} \dots 2.1 \times 10^6$                                                                                 | $2.3 \times 10^{-2} \dots 7.2 \times 10^6$                                                                                               |
| $k_{3a}, s^{-1}$               | $3.4 \times 10^{-4} \dots 3.4 \times 10^{10}$ | $4.4 \times 10^0 \dots 5.3 \times 10^8$                                                                                    | $5.5 \times 10^0 \dots 1.7 \times 10^9$                                                                                                  |
| $k_{-3a}, s^{-1}$              | $3.4 \times 10^{-4} \dots 3.4 \times 10^{10}$ | $9.6 \times 10^0 \dots 3.4 \times 10^{10}$                                                                                 | $1.2 \times 10^1 \dots 7.7 \times 10^9$                                                                                                  |
| $\alpha_{2a}, 1$               | 0.40...0.95                                   | 0.40...0.92                                                                                                                | 0.43...0.90                                                                                                                              |
| Model (b)                      |                                               |                                                                                                                            |                                                                                                                                          |
| $k_{1b}, s^{-1} cm^3 mol^{-1}$ | $3.4 \times 10^{-4} \dots 3.4 \times 10^{10}$ | $2.8 \times 10^6 \dots 3.9 \times 10^6$                                                                                    | $2.8 \times 10^6 \dots 3.5 \times 10^6$                                                                                                  |
| $k_{-1b}, s^{-1}$              | $3.4 \times 10^{-4} \dots 3.4 \times 10^{10}$ | $8.8 \times 10^0 \dots 5.5 \times 10^2$                                                                                    | $9.7 \times 10^0 \dots 1.7 \times 10^2$                                                                                                  |
| $k_{2b}, s^{-1}$               | $3.4 \times 10^{-4} \dots 3.4 \times 10^{10}$ | $3.1 \times 10^{-2} \dots 5.9 \times 10^6$                                                                                 | $3.6 \times 10^{-2} \dots 1.5 \times 10^1$                                                                                               |
| $\alpha_{2b}, 1$               | 0.40...0.95                                   | 0.42...0.91                                                                                                                | 0.64...0.90                                                                                                                              |

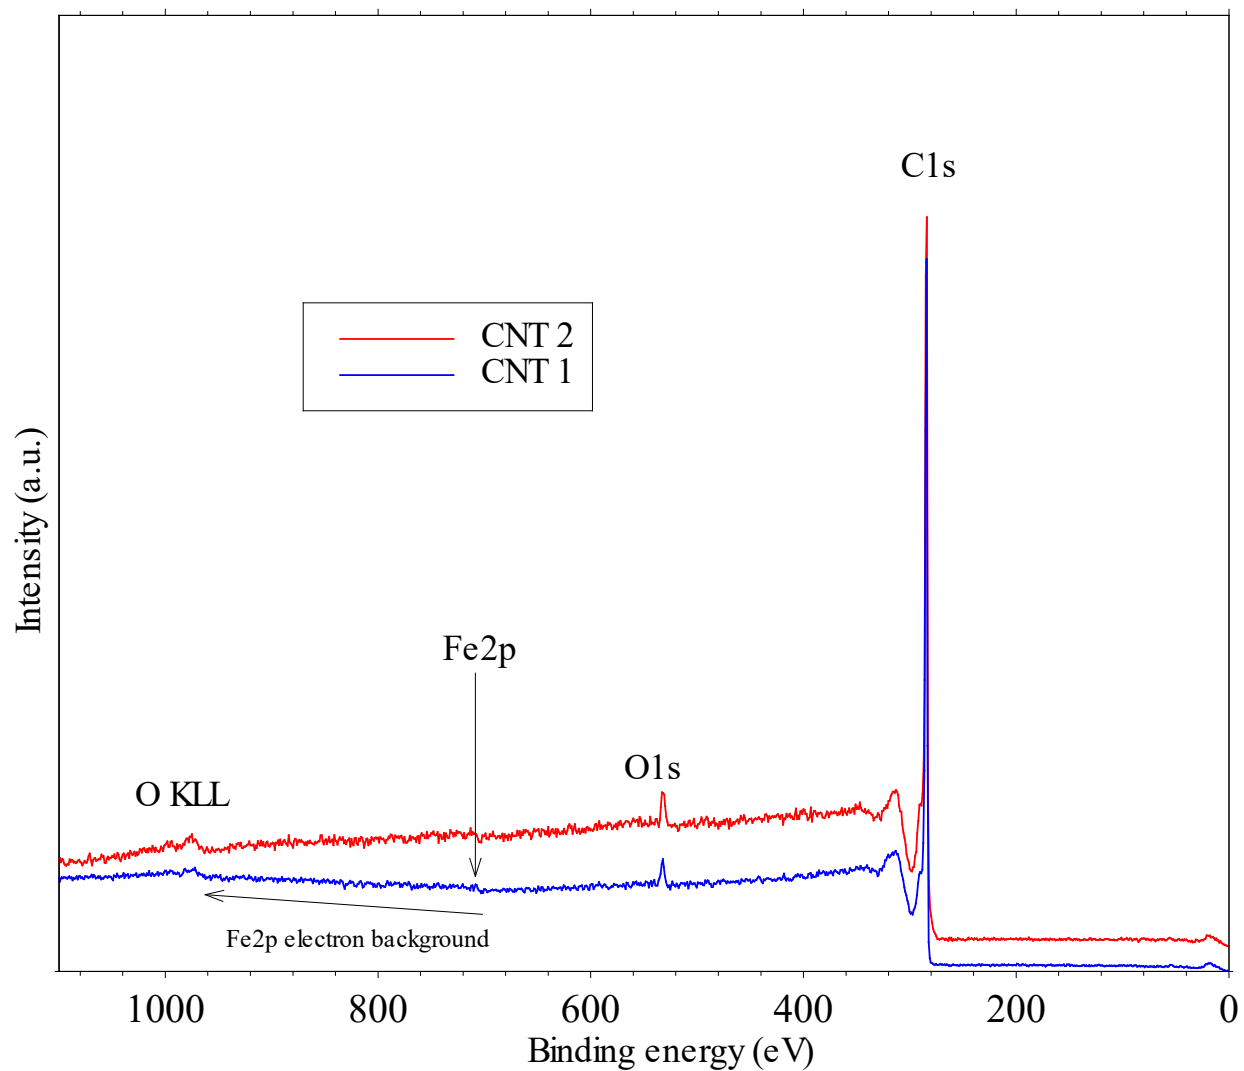

**Supplementary Figure 1.** XPS survey spectra measured for two multiwalled carbon nanotube materials: CNT 1 sample – studied in <sup>6</sup> and CNT 2 sample – studied in this work. Spectra were shifted in Y-axis for the sake of comparison.

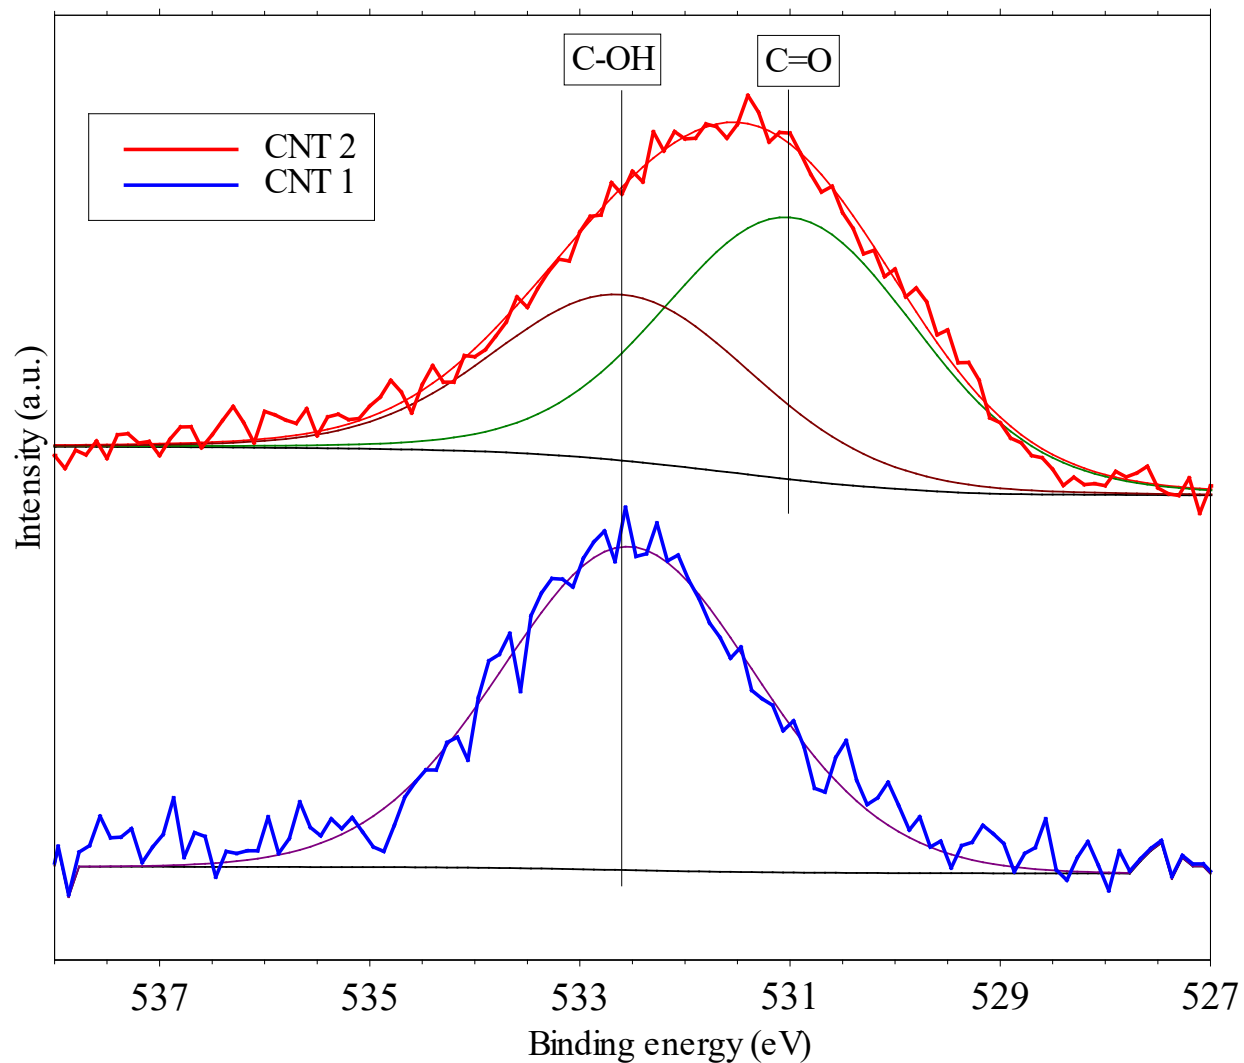

**Supplementary Figure 2.** O1s high-resolution spectra measured for two multiwalled carbon nanotube materials: CNT 1 sample – studied in <sup>6</sup> and CNT 2 sample – studied in this work. Best peak fitting results. Spectra were shifted in Y-axis for the sake of comparison.

Model (a)

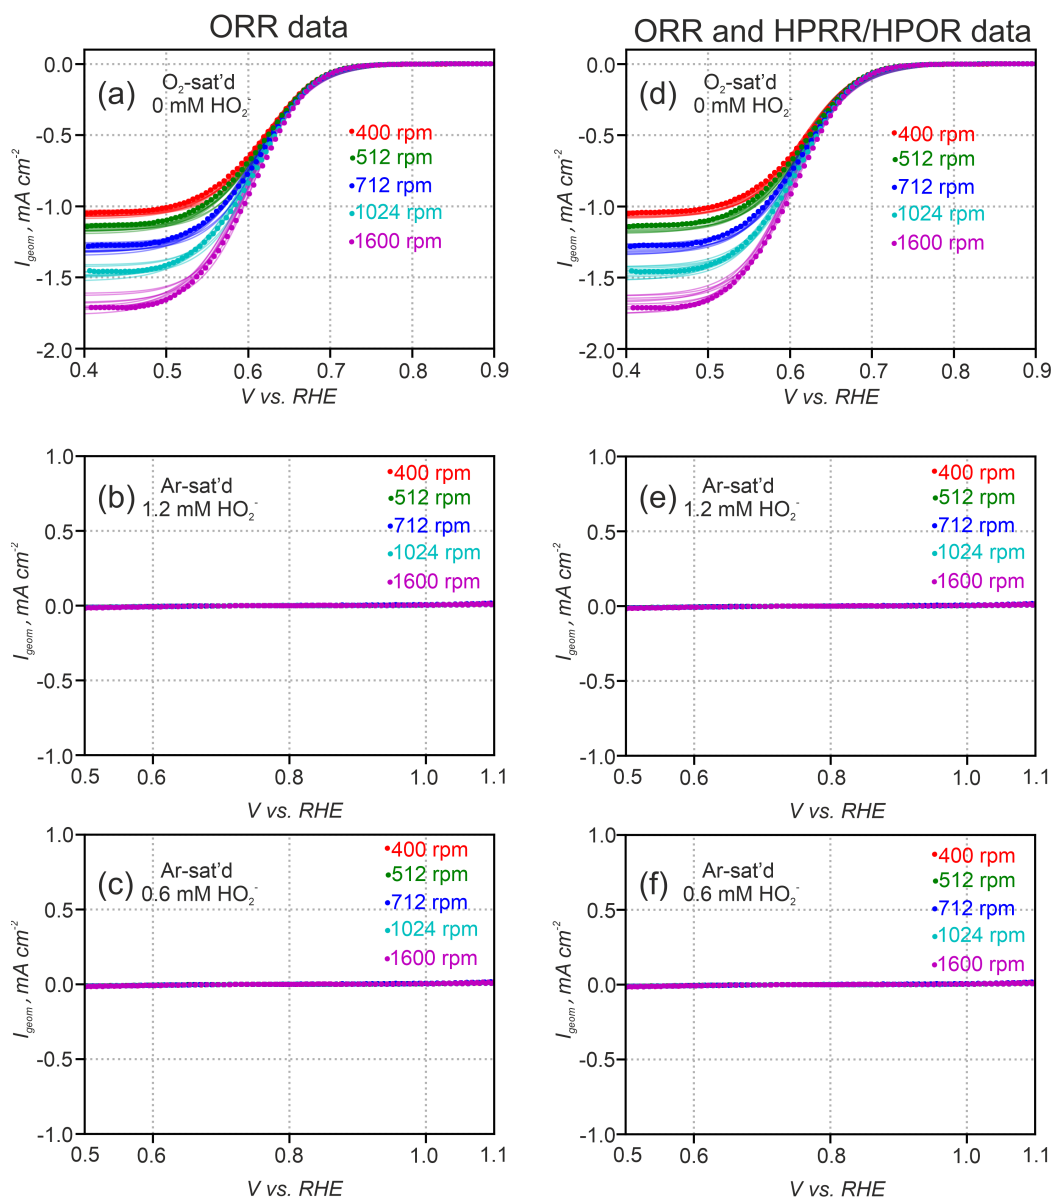

**Supplementary Figure 3.** Example of modeling results for the model (a) with 3 reaction steps. All figures include the simulated RDE CVs for 10 random sets of model parameters with target functional lower than the experimental error (semi-transparent lines) and averaged experimental data (dots). Model parameters were adjusted by fitting of ORR RDE (a-c) and both ORR and HPRR/HPOR RDE (d-f) data. Simulated RDE CVs for  $\text{O}_2$ -saturated solution (a, d), Ar-saturated solution with added 1.2 mM (b, e) and 0.6 mM (c, f) of hydroperoxide are shown.

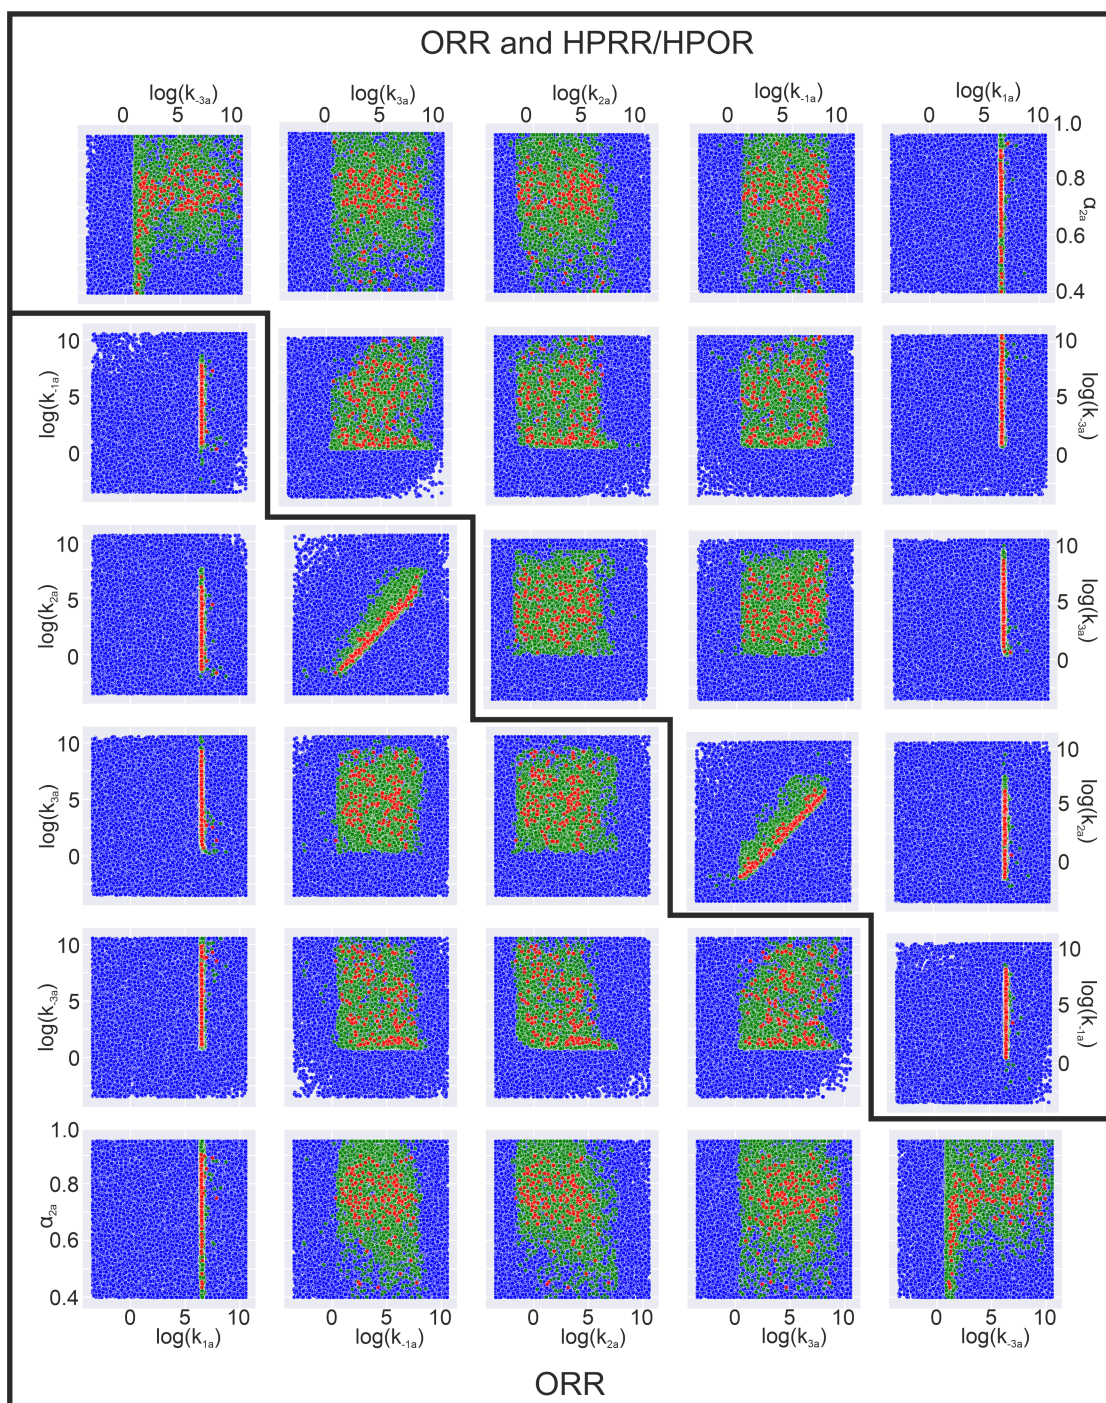

**Supplementary Figure 4.** Pair distributions of independent model (a) parameters. The figures on the left lower and right upper parts correspond to the fitting of ORR only and all ORR plus HPRR/HPOR RDE CVs respectively. Dots represent sets of the model parameters, for which target function was evaluated to be: lower than experimental error (red); between one and four experimental errors (green); higher than four experimental errors (blue).

# Model (b)

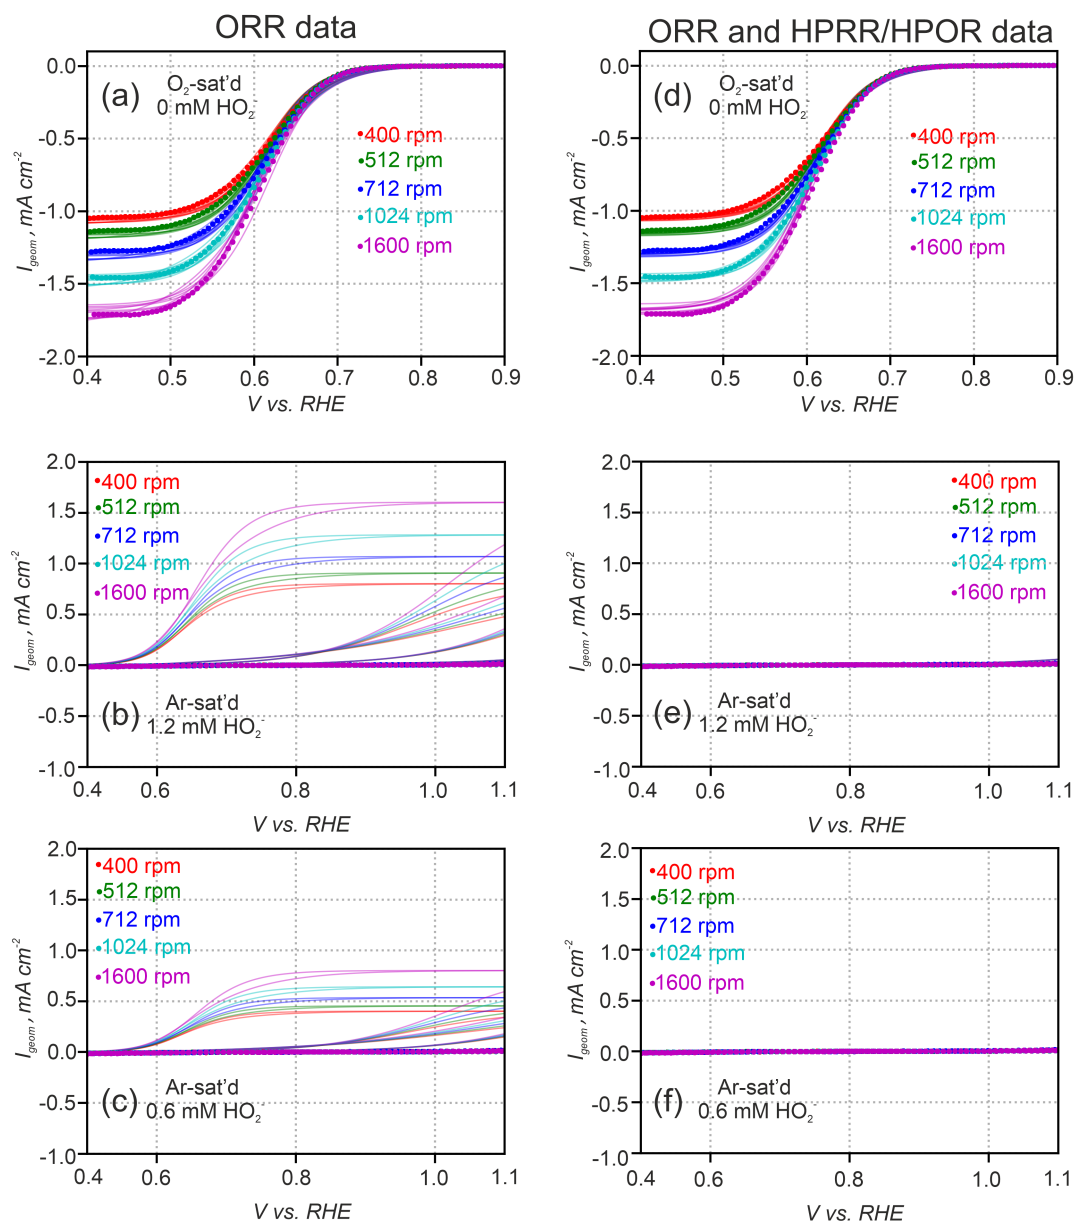

**Supplementary Figure 5.** Example of modeling results for the model (b) with 2 steps. All figures include the simulated RDE CVs for 10 random sets of model parameters with target functional lower than the experimental error (semi-transparent lines) and averaged experimental data (dots). Model parameters were adjusted by fitting of ORR RDE (a-c) and both ORR and HPRR/HPOR RDE (d-f) data. Simulated RDE CVs for  $O_2$ -saturated solution (a, d), Ar-saturated solution with added 1.2 mM (b, e) and 0.6 mM (c, f) of hydroperoxide are shown.



Model (c)

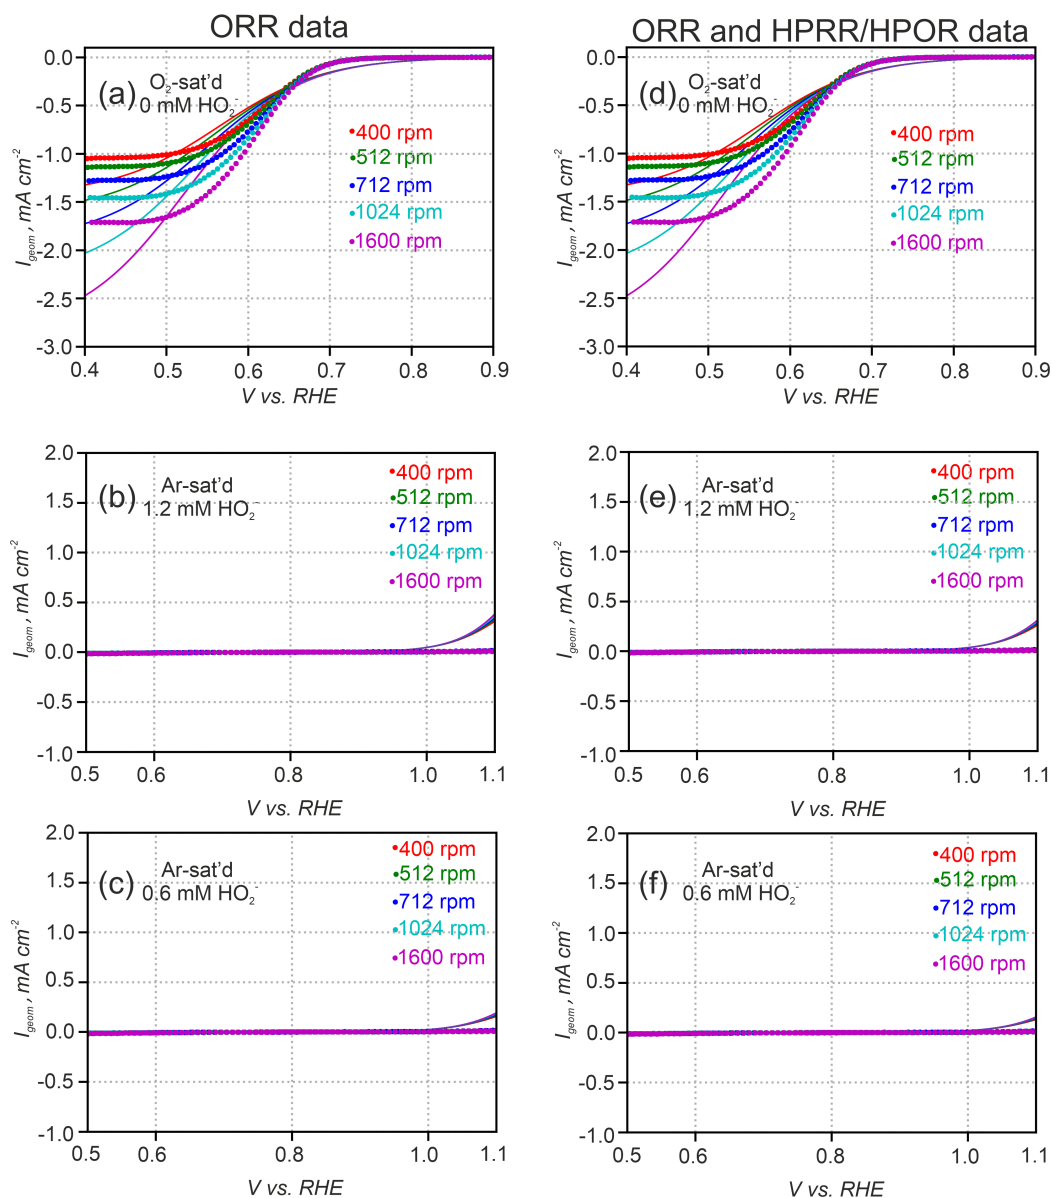

**Supplementary Figure 6.** Example of modeling results for the model (c) with a single step. All figures include the simulated RDE CVs for 10 random sets of model parameters with target functional lower than the experimental error (semi-transparent lines) and averaged experimental data (dots). Model parameters were adjusted by fitting of ORR RDE (a-c) and both ORR and HPRR/HPOR RDE (d-f) data. Simulated RDE CVs for  $O_2$ -saturated solution (a, d), Ar-saturated solution with added 1.2 mM (b, e) and 0.6 mM (c, f) of hydroperoxide are shown.

## References.

- 1 V. G. Levich, *Physicochemical hydrodynamics*, Prentice Hall, Scripta Technica, Inc., Englewood Cliffs, N. J., 1962.
- 2 N. M. Marković, H. A. Gasteiger and P. N. Ross, *J. Phys. Chem.*, 1996, **100**, 6715–6721.
- 3 R.E. Davis, G.L. Horvath and C.W. Tobias, *Electrochim. Acta*, 1967, **12**, 287–297.
- 4 J. T. Mefford, A. A. Kurilovich, J. Saunders, W. G. Hardin, A. M. Abakumov, R. P. Forslund, A. Bonnefont, S. Dai, K. P. Johnston and K. J. Stevenson, *Phys. Chem. Chem. Phys.*, 2019, **21**, 3327–3338.
- 5 M. T. M. Koper and J. H. Sluyters, *J. Electroanal. Chem. Interfacial Electrochem.*, 1991, **303**, 73–94.
- 6 C. T. Alexander, A. M. Abakumov, R. P. Forslund, K. P. Johnston and K. J. Stevenson, *ACS Appl. Energy Mater.*, 2018, **1**, 1549–1558.
